# Supplementary material for: Spatial Connections between Microplastics and Heavy Metal Pollution within Floodplain Soils
Source: MDPI journal article supplement (doi:10.3390/app12020595), 2022-01-08
Supplement: s1 [file s1]

# **Supplementary Material**

## **Spatial Connections between Microplastics and Heavy Metal Pollution within Floodplain Soils**

**Collin J. Weber <sup>1,\*</sup>, Jens Hahn <sup>2</sup> and Christian Opp <sup>1</sup>**

<sup>1</sup> Department of Geography, Philipps-Universität Marburg, 35037 Marburg, Germany; opp@staff.uni-marburg.de

<sup>2</sup> Federal Institute of Hydrology, 56068 Koblenz, Germany; jens.hahn@bafg.de

\* Correspondence: collin.weber@geo.uni-marburg.de

**Table S1:** Mesoplastic and coarse microplastic particles for metal detection.

| Size class <sup>a</sup> | Soil sample | Depth (cm) <sup>b</sup> | Particle mass (mg) | Description of particles                 | Main polymer type | Example picture                                                                       |
|-------------------------|-------------|-------------------------|--------------------|------------------------------------------|-------------------|---------------------------------------------------------------------------------------|
| 5                       | ELM-1-1     | 0-10                    | 16.50              | fragments (white)                        | PMMA              | 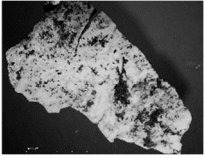   |
| 5                       | ELM-1-3     | 20-30                   | 11.30              | plates (silver)                          | POM               |    |
| 2                       | ELM-1-3     | 20-30                   | 30.40              | films and fragments (white/transparent)  | PA                |    |
| 2                       | ELM-1-4     | 30-40                   | 23.50              | fragments (silver/white)                 | CSM               |    |
| 5                       | LIM-1-1     | 0-10                    | 42.10              | fragments (white/transparent)            | PP                |   |
| 5                       | LIM-1-2     | 10-20                   | 17.00              | films (transparent)                      | PE-LD             |  |
| 5                       | ROT-1-2     | 0-10                    | 131.40             | fragment (white, massive)                | PE-LD             |  |
| 5                       | STD-1-2     | 10-20                   | 42.10              | fragment and film (transparent /colored) | CSM               |  |
| 5                       | STD-1-3     | 20-30                   | 40.90              | film (white)                             | PE-LD             |  |
| 5                       | STD-4-1     | 0-10                    | 120.90             | film (transparent/blue)                  | PP                |  |

<sup>a</sup> Sieved size class of plastic particles, <sup>b</sup> Depth of sampling section within soil profile

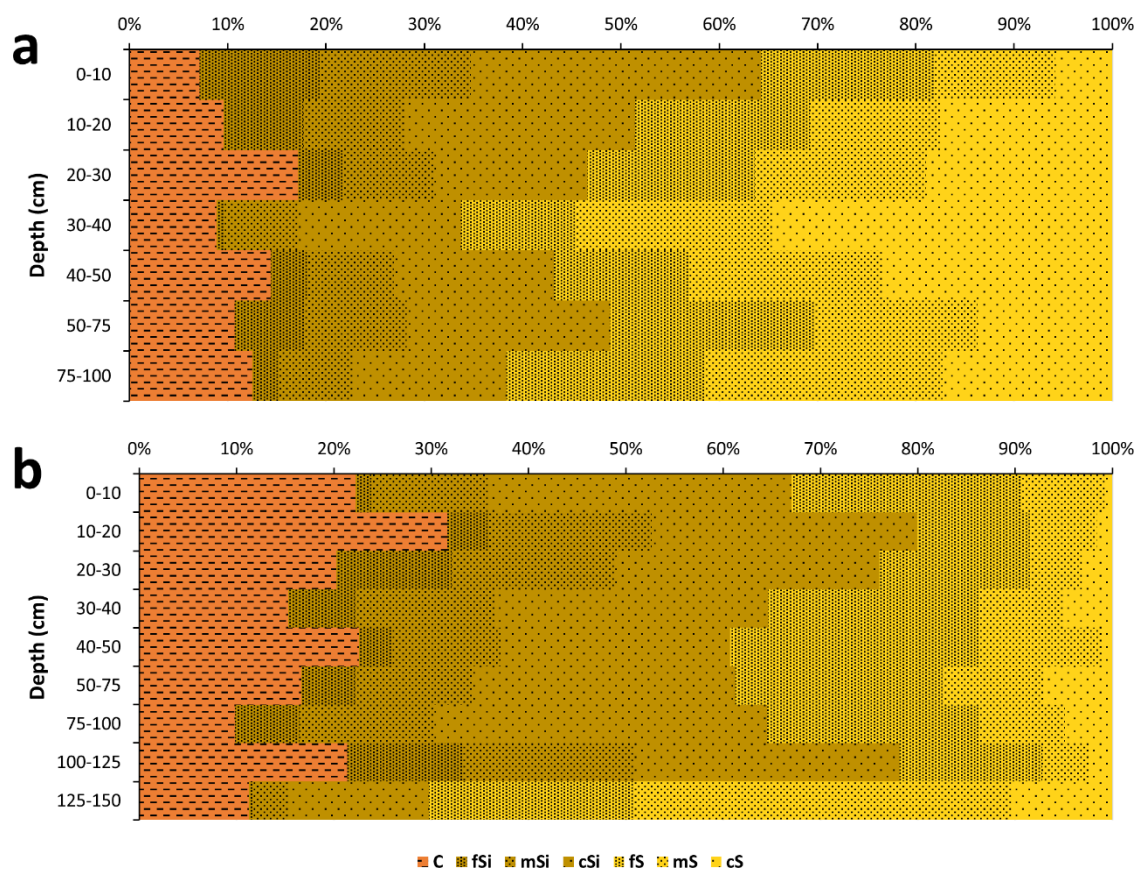

**Figure S1:** Grain size distribution for soil profiles of site ELM. a: Profile ELM-1, b: Profile ELM-2.

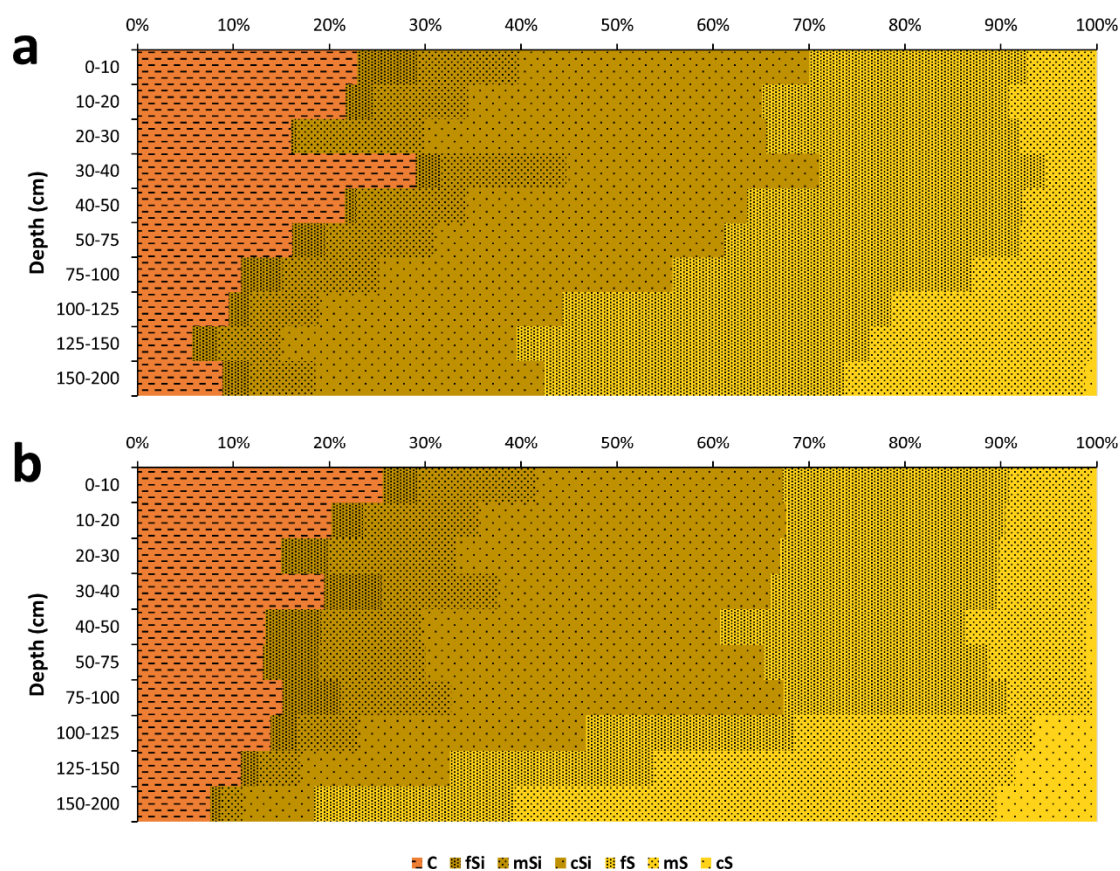

**Figure S2:** Grain size distribution for soil profiles of site ROT. a: Profile ROT-1, b: Profile ROT-2.



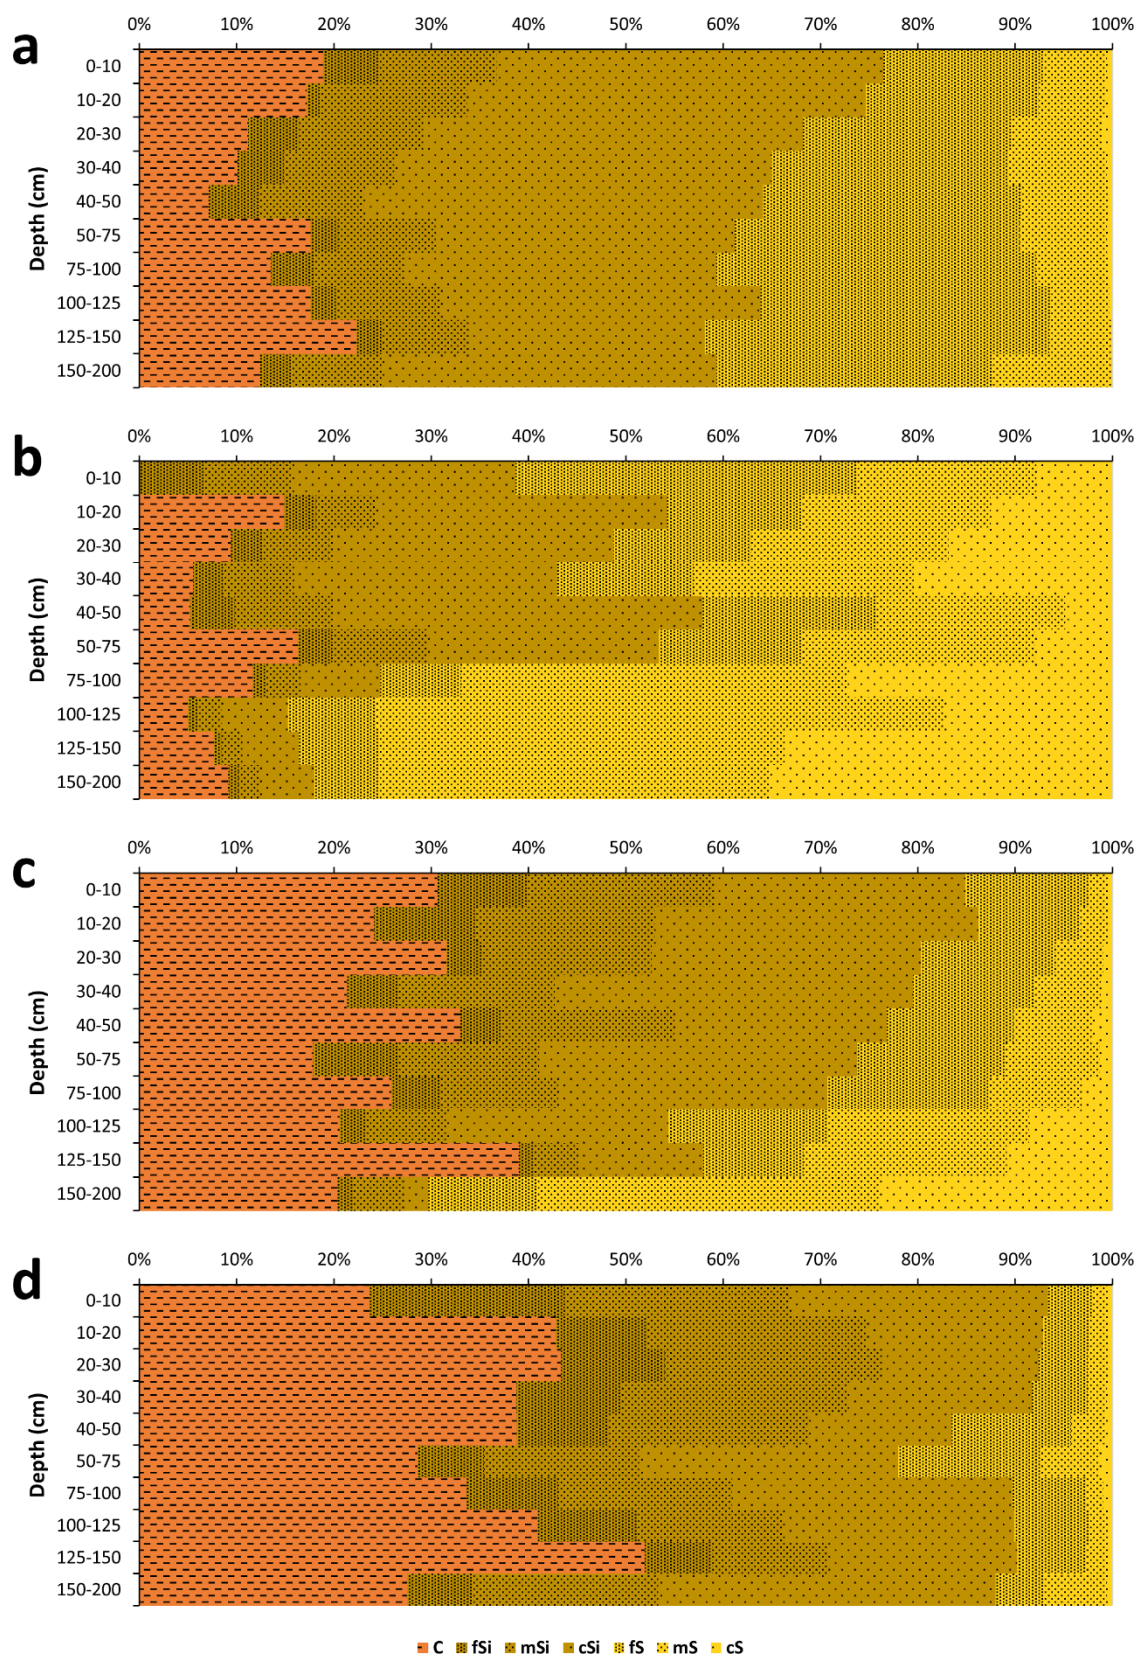

**Figure S3:** Grain size distribution for soil profiles of site STD. a: Profile STD-1, b: Profile STD-2, c: Profile STD-3, d: Profile STD-4.

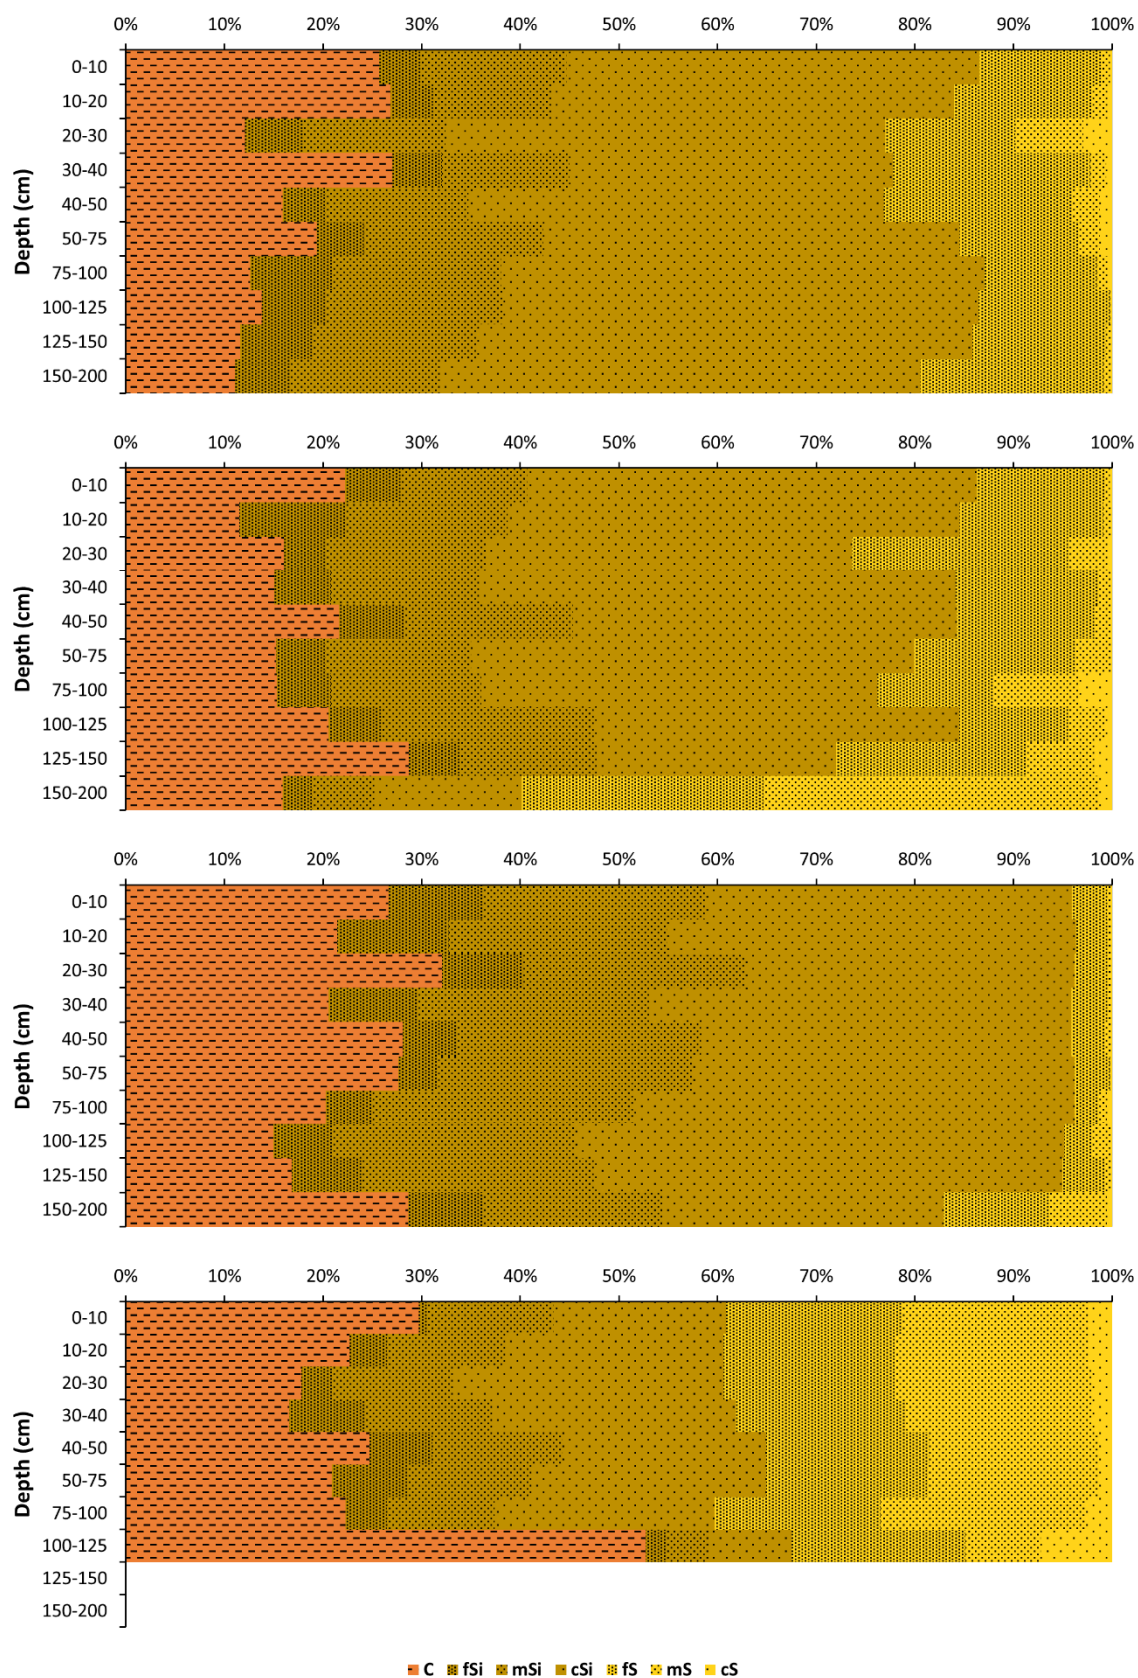

**Figure S4:** Grain size distribution for soil profiles of site LIM. a: Profile LIM-1, b: Profile LIM-2, c: Profile LIM-3, d: Profile LIM-4.

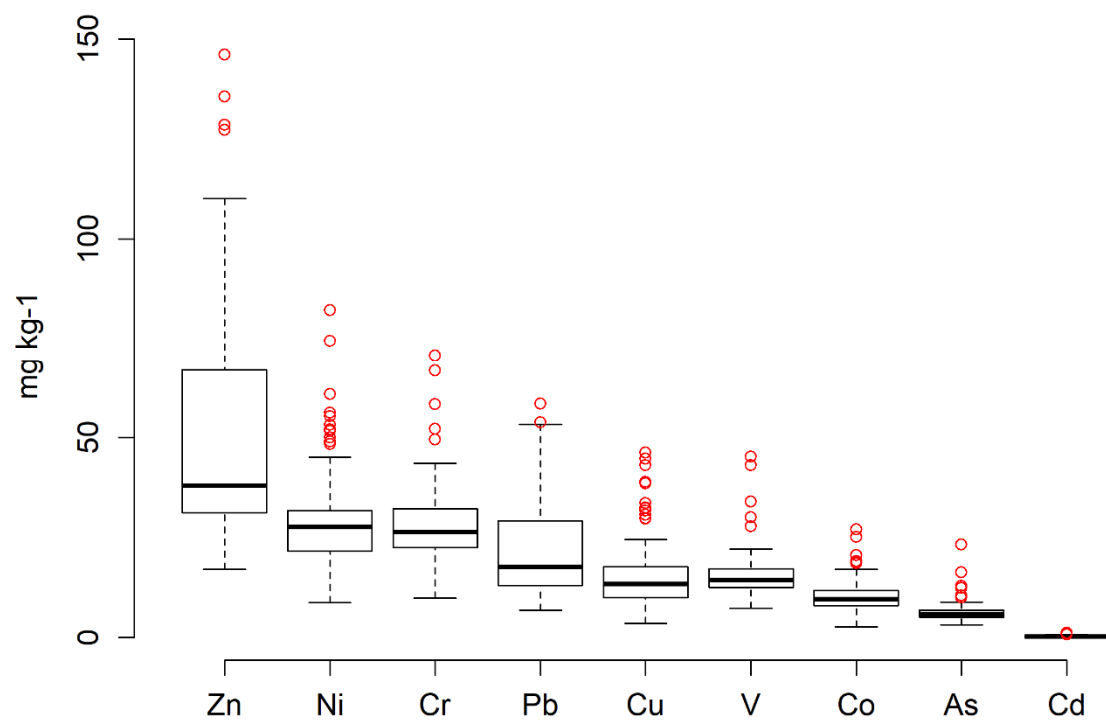

**Figure S5:** Heavy metal and metalloid As concentrations (mg kg<sup>-1</sup>) from floodplain soils samples ( $n = 112$ ) ordered by descending mean concentration.
